# Supplementary material
Source: Springer Nature journal article supplement (https://www.springermedizin.de/resource/supplementary/12967_2014_1848_MOESM1_ESM.pdf/9574976)
Supplement: MOESM1 [file 9574976]

Supplementary table 1: Laboratory parameter in GANI\_MED

| Parameter                      | Unit     | Lower Reference Limit | Upper Reference Limit |
|--------------------------------|----------|-----------------------|-----------------------|
| <b>EDTA plasma</b>             |          |                       |                       |
| Leucocytes                     | Gpt/l    | 4,3                   | 10,0                  |
| Erythrocytes (Erys)            | Tpt/l    | 4,2                   | 6,2                   |
| Hemoglobin                     | mmol/l   | 7,4                   | 11,2                  |
| Hematocrit                     |          | 0,35                  | 0,51                  |
| MCV                            | fl       | 80                    | 95                    |
| MCH                            | fmol     | 1,68                  | 2,00                  |
| MCHC                           | mmol/l   | 18,5                  | 22,5                  |
| Ery distribution               | %        | 11,0                  | 16,0                  |
| Range of ery distribution      | fl       | 37                    | 54                    |
| Thrombocytes                   | Gpt/l    | 140                   | 440                   |
| Mean platelet volume           | fl       | 9,0                   | 13,0                  |
| Range of platelet distribution | fl       | 9,0                   | 17,0                  |
| Prothrombin time (Quick)       | %        | 70                    | 130                   |
| HbA1c                          | %        | 0                     | 6,5                   |
| <b>Citrate plasma</b>          |          |                       |                       |
| INR                            |          | 1,0                   | 1,2                   |
| aPTT                           | s        | 25                    | 33                    |
| <b>Heparin plasma</b>          |          |                       |                       |
| Sodium                         | mmol/l   | 135                   | 145                   |
| Potassium                      | mmol/l   | 3,7                   | 5,1                   |
| Calcium                        | mmol/l   | 2,20                  | 2,65                  |
| Phosphate                      | mmol/l   | 0,60                  | 1,60                  |
| Glucose                        | mmol/l   | 3,9                   | 6,4                   |
| Creatinine                     | µmol/l   | 58                    | 127                   |
| Urea                           | mmol/l   | 2,5                   | 6,4                   |
| Uric acid                      | µmol/l   | 155                   | 428                   |
| Total Cholesterol              | mmol/l   |                       | <6,0                  |
| HDL-Cholesterol                | mmol/l   | >1,03                 |                       |
| LDL-Cholesterol                | mmol/l   | 0                     | 3,34                  |
| Triglycerides                  | mmol/l   | 0                     | 1,9                   |
| ALAT (GPT)                     | µkatal/l | 0                     | 0,77                  |
| ASAT (GOT)                     | µkatal/l |                       | <0,59                 |

|                 |          |      |      |
|-----------------|----------|------|------|
| Gamma-GT        | μkatal/l | 0    | 0,96 |
| Bilirubin total | μmol/l   | 0    | 17,0 |
| Lipase          | μkatal/l | 1,59 | 6,36 |
| CRP             | mg/l     |      | <5,0 |
| TSH             | mU/l     | 0,25 | 2,11 |
| Albumin         | g/l      | 34   | 50   |
| Protein         | g/l      | 65   | 85   |

### Urine

|                 |                   |          |          |
|-----------------|-------------------|----------|----------|
| Specific weight | kg/l              | 1,005    | 1,030    |
| pH              |                   | 4,5      | 7,5      |
| Leucocytes      | number/μl         | 0        | 10       |
| Nitrite         | positive/negative | negative | negative |
| Protein         | g/l               | 0        | 0,2      |
| Glucose         | mmol/l            | 0        | 2        |
| Ketone          | mmol/l            | 0        | 0,2      |
| Urobilinogen    | μmol/l            | 0        | 10       |
| Bilirubin       | μmol/l            | 0        | 5        |
| Erys/Blood      | number/μl         | 0        | 5        |
| U-Creatinine    | mmol/l            | 3,0      | 11,5     |
| U-Albumin       | mg/l              | 2        | 35       |

---
